# Supplementary material
Source: PubMed Central journal article supplement (PMC3150712)
Supplement: mmc1.pdf [file mmc1.pdf]

# **Cardiolipin Affects the Supramolecular Organization of ATP Synthase in Mitochondria**

Devrim Acehan,<sup>†‡</sup> Ashim Malhotra,<sup>§</sup> Yang Xu,<sup>§</sup> Mindong Ren,<sup>†</sup> David L. Stokes,<sup>†‡¶</sup> and Michael Schlame<sup>†§</sup>

<sup>†</sup>Department of Cell Biology, <sup>‡</sup>Skirball Institute, Structural Biology Program, and <sup>§</sup>Department of Anesthesiology, New York University School of Medicine, New York, New York; and <sup>¶</sup>New York Structural Biology Center, New York, New York

## **Supporting Material**

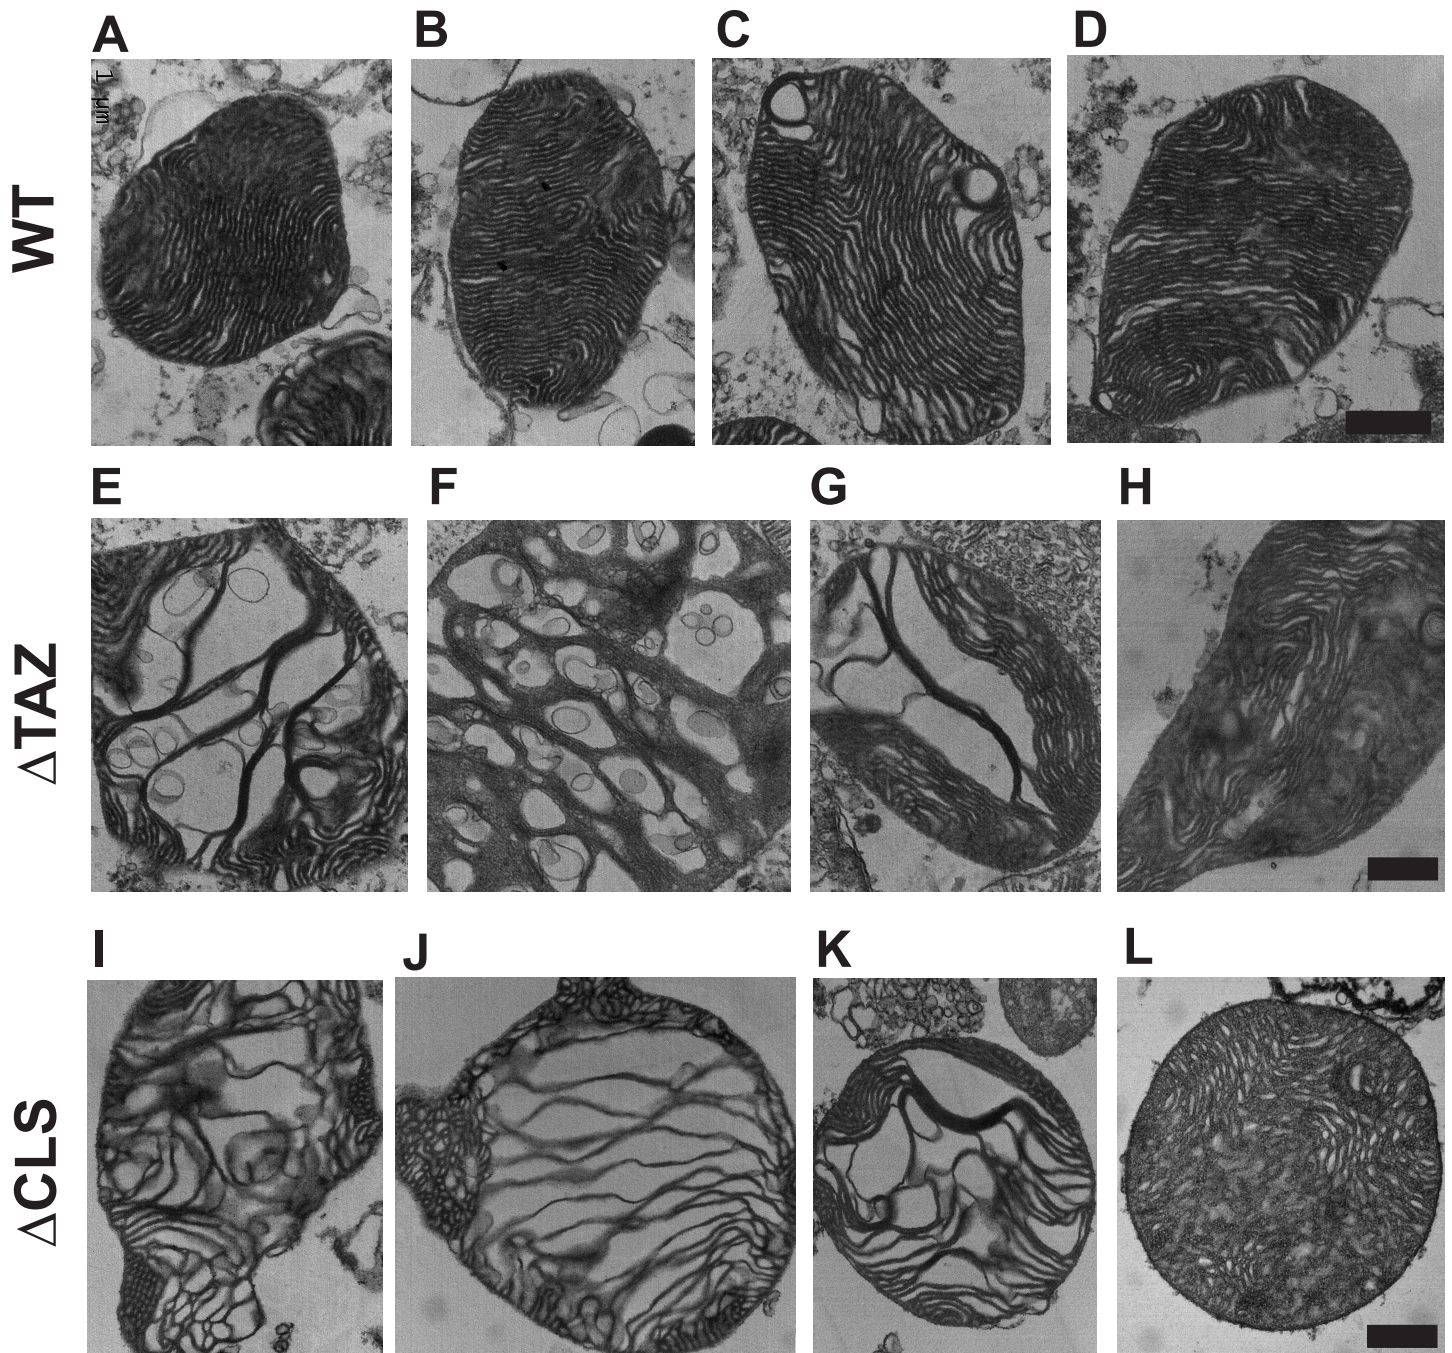

**Supporting Figure S1.** Electron micrographs of isolated mitochondria from *Drosophila* flight muscle. Mitochondria were isolated, chemically fixed, resin infiltrated, sectioned and stained with uranyl acetate and lead stain. Wild-type mitochondria (A-D) show the characteristic morphology of flight muscle mitochondria with high cristae density (19, 27). Preparations from the tafazzin mutant ( $\Delta$ TAZ) contain both abnormal (E-G) and normal (H) mitochondria. Preparations from the cardiolipin synthase mutant ( $\Delta$ CLS) also contain abnormal (I-K) and normal (L) mitochondria. Bars: 500 nm.

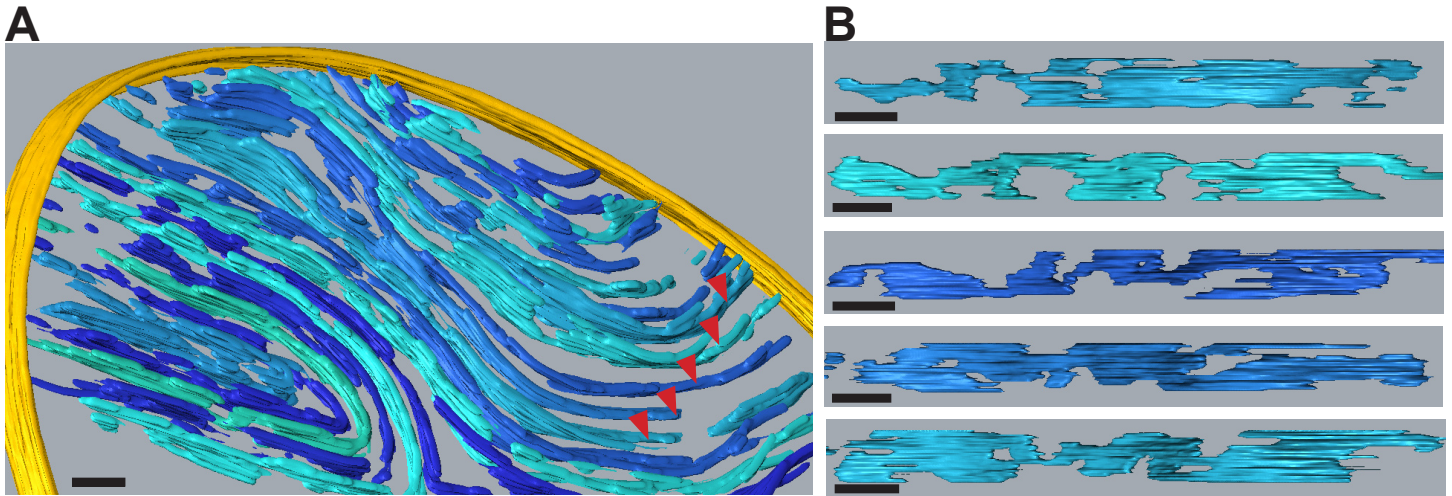

**Supporting Figure S2.** Ultrastructure of flight muscle mitochondria. *Drosophila* flight muscle was fixed and electron microscopic tomography was performed as described (20). (A) The 3-D model shows densely packed multi-lamellar cristae in shades of blue. The outer membrane is shown in yellow. (B) Single cristae, marked with red arrow heads in panel A, are shown in a different view. Cristae consist of flat sacs (50-250nm) interconnected by tubes. Bars: 100nm.

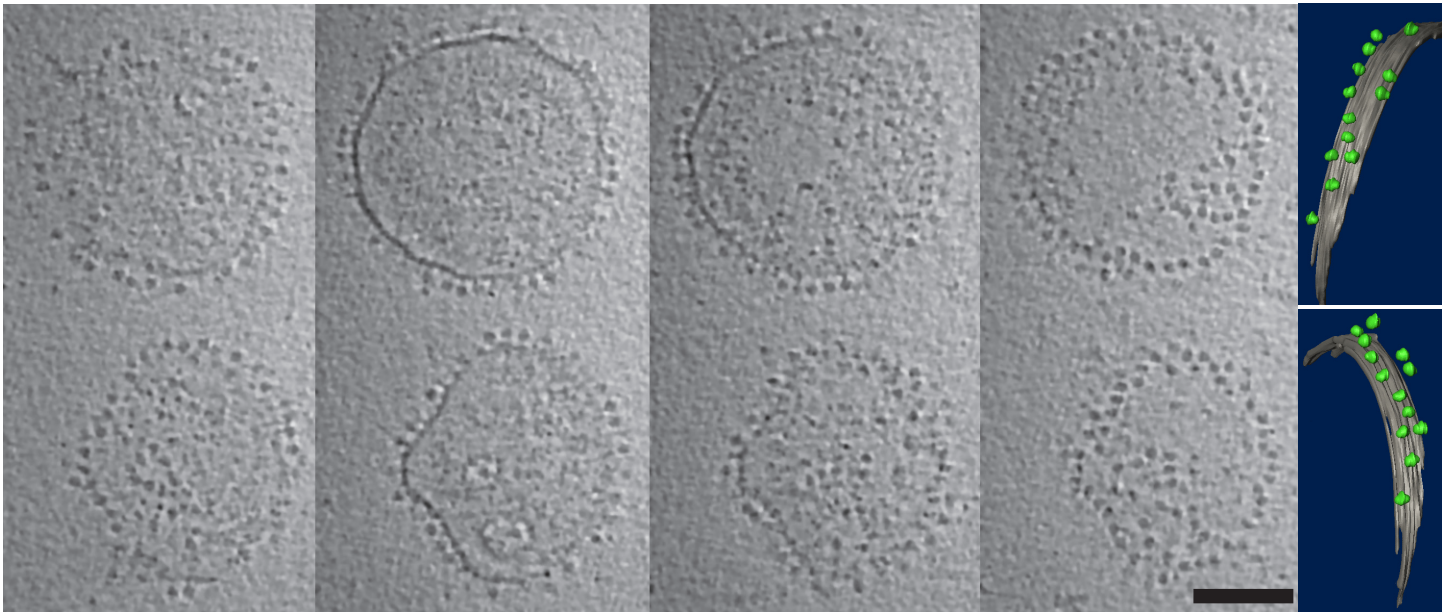

**Supporting Figure S3.** Slices of a tomogram of two membrane vesicles. *Drosophila* flight muscle mitochondria were isolated and processed for cryo-electron microscopy as described in Materials and Methods. Tomogram slices are arranged according to their position in the volume. Numerous F1 particles (diameter: 9 nm) are visible at the membrane surface. A 3-D model of a portion of the tomogram is shown on the right with the membrane in grey and selected F1 particles in green. Bar: 100 nm.

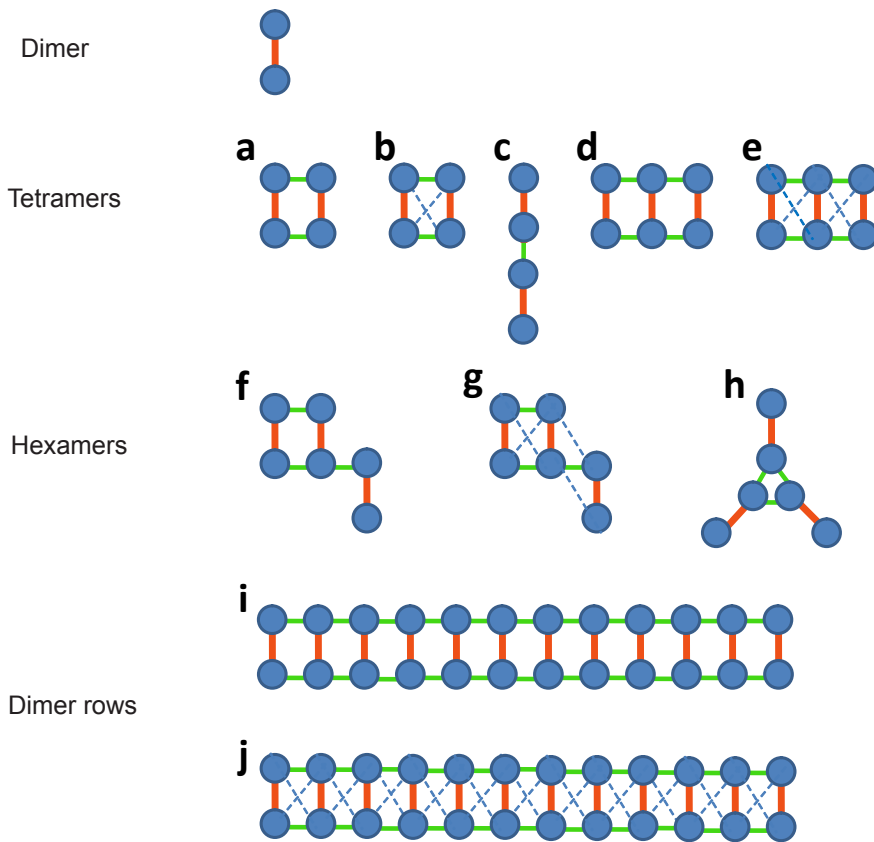

| Type       | Species | Average number of neighbors per F <sub>1</sub> particle |                               |                                            |
|------------|---------|---------------------------------------------------------|-------------------------------|--------------------------------------------|
|            |         | Total                                                   | Close neighbors (green lines) | Far neighbors (red lines and dashed lines) |
| Dimer      |         | 1                                                       | 0                             | 1                                          |
| Tetramers  | a       | 2                                                       | 1                             | 1                                          |
|            | b       | 3                                                       | 1                             | 2                                          |
|            | c       | 1½                                                      | ½                             | 1                                          |
| Hexamers   | d       | 2⅓                                                      | 1⅓                            | 1                                          |
|            | e       | 3⅓                                                      | 1⅓                            | 2⅓                                         |
|            | f       | 2                                                       | 1                             | 1                                          |
|            | g       | 3⅓                                                      | 1                             | 2⅓                                         |
|            | h       | 2                                                       | 1                             | 1                                          |
| Dimer rows | i       | 3                                                       | 2                             | 1                                          |
|            | j       | 5                                                       | 2                             | 3                                          |

**Supporting Figure S4.** Idealized structural models of hypothetical assemblies of ATP synthase dimers. Dimers can associate to form various types of tetramers (a-c), hexamers (d-h), or multimers (i-j). In this figure, dimers are shown as two circles connected by a red line. Green lines indicate dimer-dimer interactions and blue dashed lines indicate that F<sub>1</sub> particles in diagonal position are close enough to be considered neighbors. The experimental data suggest the presence of two close neighbors and two far neighbors per F<sub>1</sub> particle, which is consistent with an intermediate structure between i and j.

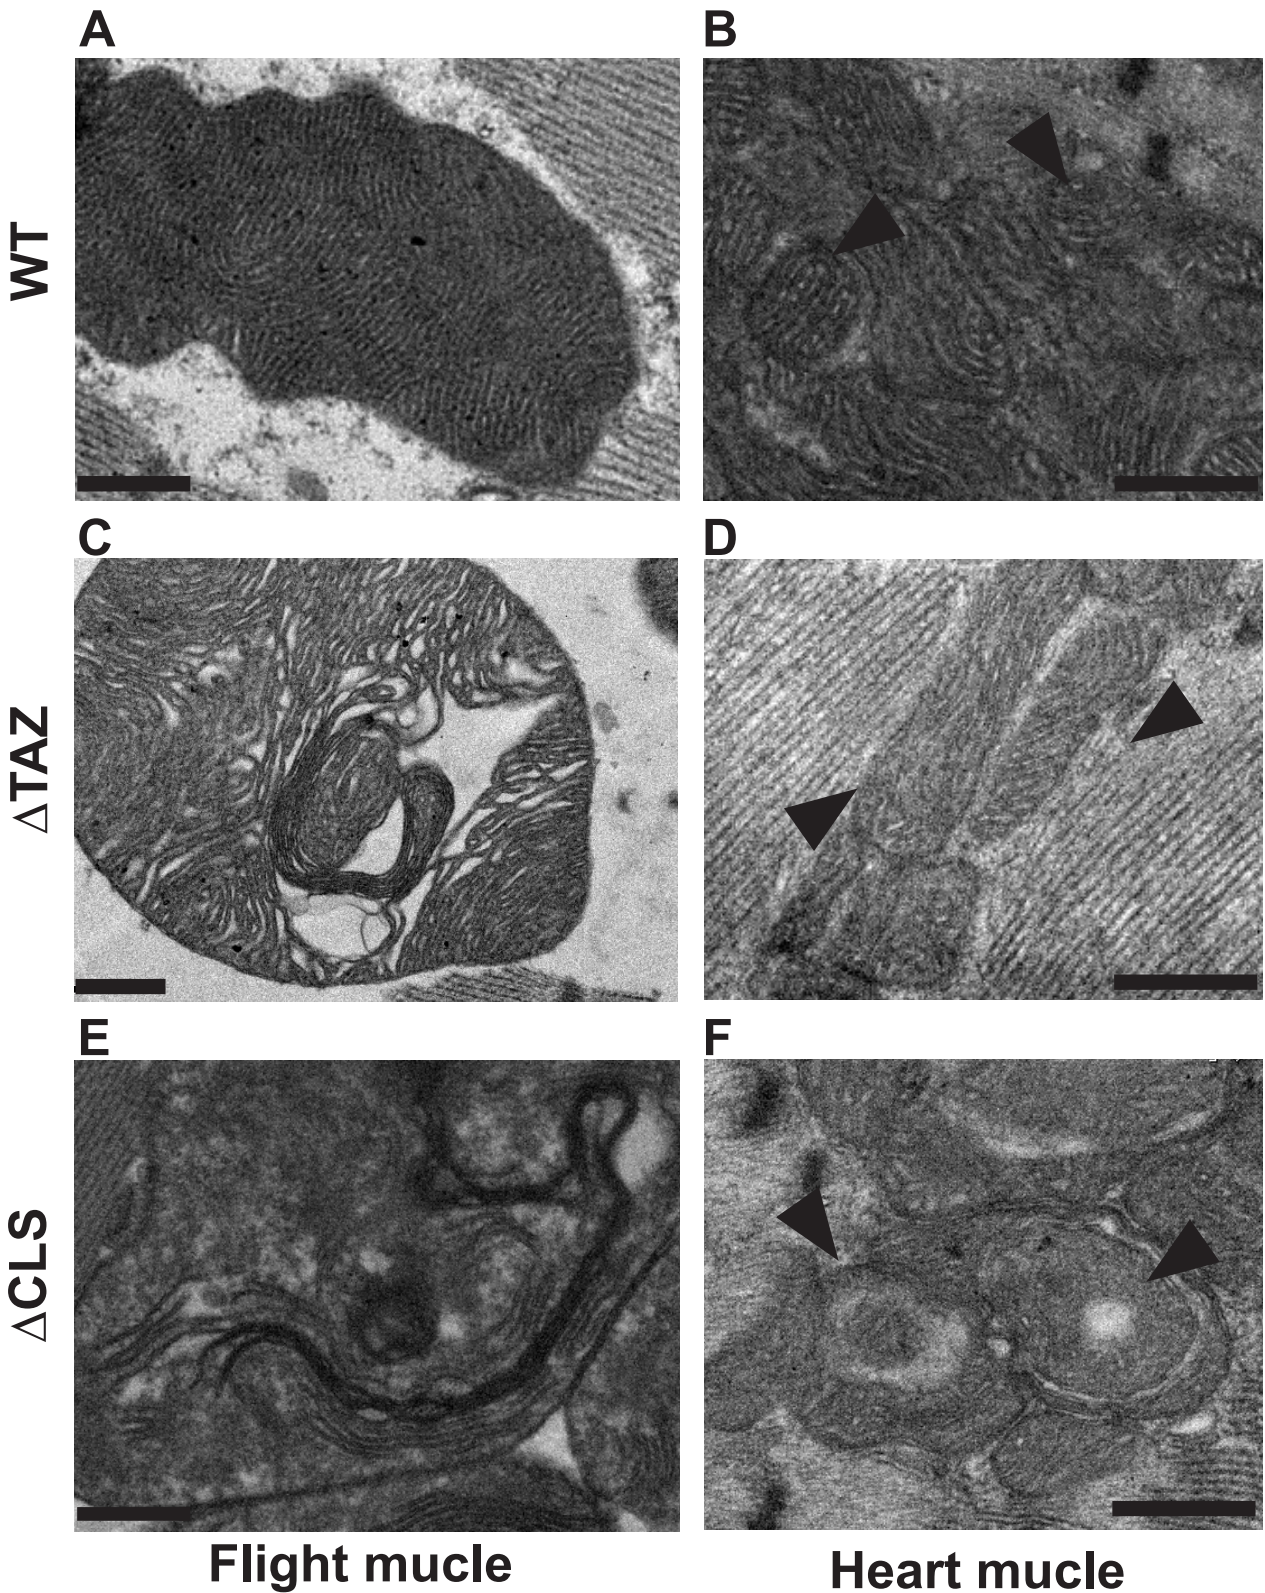

**Supporting Figure S5.** Electron micrographs of mitochondria in situ. *Drosophila* thoraces were fixed and stained as described (20). The images show electron micrographs of flight muscle and heart muscle in wild-type flies (WT), tafazzin mutants ( $\Delta$ TAZ), and cardiolipin synthase mutants ( $\Delta$ CLS). Arrow heads point to mitochondria. In  $\Delta$ TAZ, abnormal mitochondria were observed in flight muscle (C). In  $\Delta$ CLS, abnormal mitochondria were observed in both flight muscle (E) and heart muscle (F). Bars: 500 nm.

WT

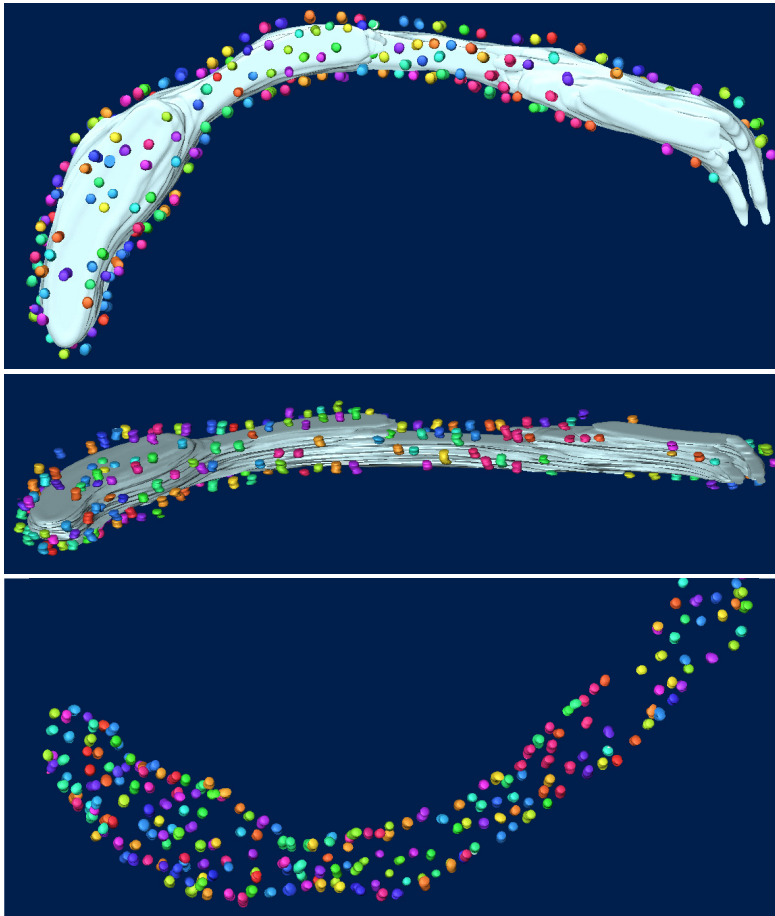

$\Delta$ CLS

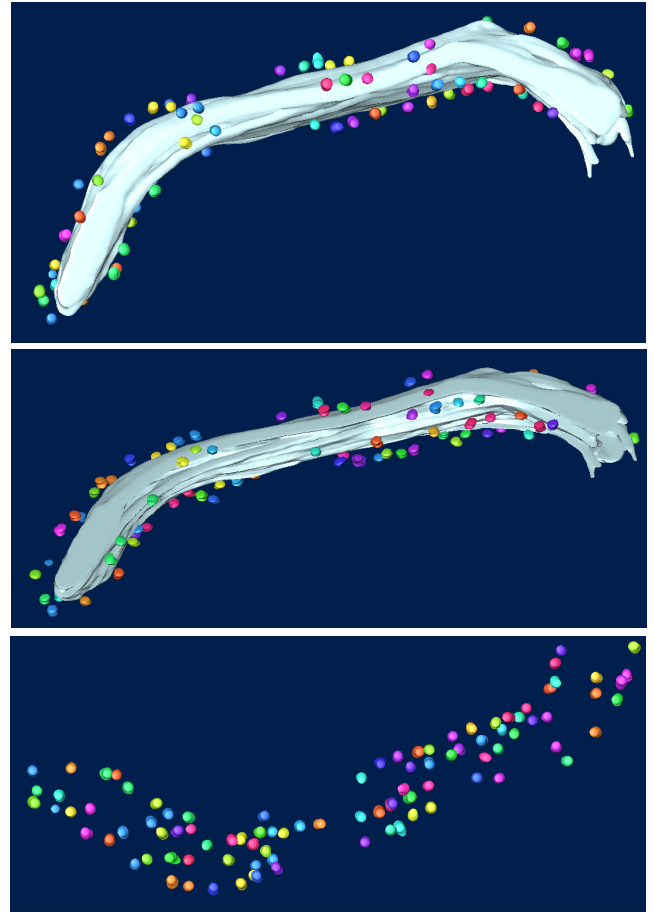

**Supporting Figure S6.** Tubular fragments of *Drosophila* flight muscle mitochondria. The figure shows 3-D models of tomograms of tubular fragments from wild-type (WT) and cardiolipin synthase mutant ( $\Delta$ CLS) mitochondria in different views. F1 particles are shown in random colors; the membrane surface is shown in grey. The surface concentration of ATP synthase is lower in  $\Delta$ CLS compared to WT.

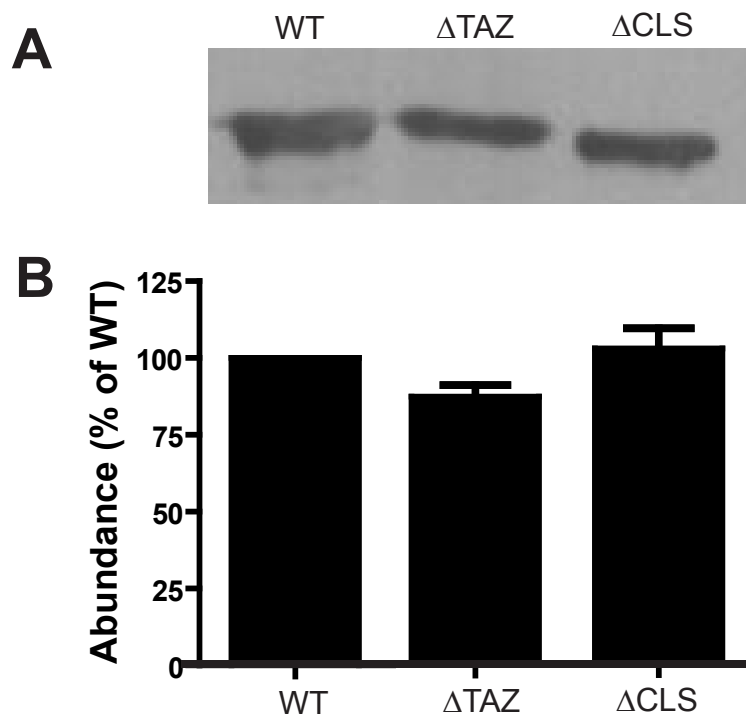

**Supporting Figure S7.** Abundance of ATP synthase in flight muscle mitochondria isolated from *Drosophila* strains, including wild-type (WT), cardiolipin synthase mutant ( $\Delta$ CLS), and tafazzin mutant ( $\Delta$ TAZ). (A) Western blot with monoclonal antibody to the  $\alpha$ -subunit of ATP synthase (25  $\mu$ g mitochondrial protein per lane). (B) Densitometry of four Western blot analyses. Results are expressed in percent of wild-type abundance.



**Supporting Movie.** 3-D model showing two parallel rows of ATP synthase dimers at the high-curvature edge of a membrane vesicle. Two parallel rows of dimers (one colored red, the other colored blue) are located on opposite sides of the edge of the disc-shaped vesicle. Dimers are colored in alternating shades of red or blue.  $F_1$  particles on the flat surface of the vesicle are colored white and  $F_1$  particles that could not be assigned to any dimer are colored yellow. The surface of the vesicle is colored grey.
